# Supplementary material
Source: PubMed Central journal article supplement (PMC2660982)

## Supplementary Figure S1

Simulated population dynamics after parameter changes to get closer to the observed dynamical properties. (a) Parasite-reduced hare fecundity,  $\delta$ , increased from 0.0001 to 0.001 hare parasite<sup>-1</sup>. (b) Hare intrinsic mortality,  $b$ , increased from 0.61 to 1.40 year<sup>-1</sup> and parasite-induced mortality,  $\alpha$ , from 0.000008 to 0.000014 year<sup>-1</sup>. Both resulted in a stable limit cycle which passed through unrealistically high parasite and low hare numbers. For the limit cycle in state space, the velocity within the limit cycle is indicated by the length of the dashes, one per year.

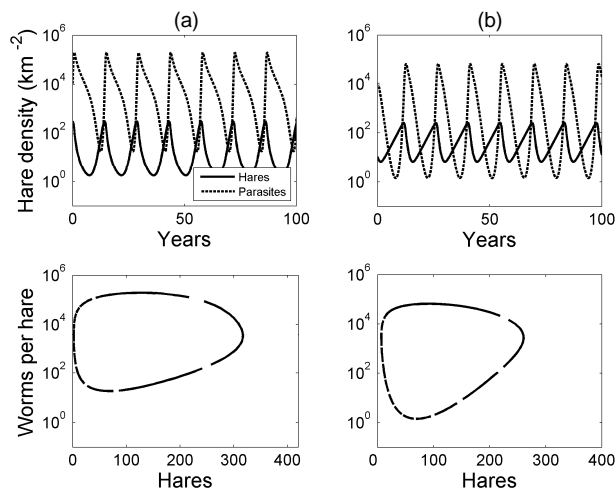

Supplement: rspb20081669s08.pdf [file rspb20081669s08.pdf]
